# Supplementary material
Source: publisher figshare collection journal article supplement (https://acs.figshare.com/ndownloader/files/4386205)
Supplement: Supplementary file 1 [file 4386205]

## Supporting Information

### Synthesis of Defined Ubiquitin Dimers

Silvia Eger, Martin Scheffner\*, Andreas Marx\*, and Marina Rubini\*

*Department of Chemistry, Department of Biology, and Konstanz Research School Chemical Biology, University of Konstanz, 78457 Konstanz, Germany*

Detailed Experimental Procedures

Figure S1: Click reaction with biotin and fluorescent dye

Figure S2: E6-AP auto-ubiquitination assay with modified Ub monomers

Figure S3-S7: MS/MS spectra of tryptic fragments of synthetic Ub dimers

## Detailed Experimental Procedures

### Materials

All chemicals were of analytical grade and purchased from Sigma-Aldrich, ABCR or Bachem. NMR spectra were acquired on a Bruker AVANCE III 400 MHz spectrometer with proton resonance frequencies of 400 MHz.

LB medium was from Roth (Lennox, LB-broth), anti-Ubiquitin antibody (rabbit polyclonal IgG) was from Upstate, alkaline phosphatase conjugated affinity purified goat anti rabbit IgG was from Millipore.

### Chemical Synthesis

Azidohomoalanine (Aha) was prepared as previously described by Link *et al.*<sup>1</sup> 5-(Dimethylamino)-*N*-(2-propynyl)-1-naphthalenesulfonamide (**Y**) was synthesized according to Bolletta *et al.*<sup>2</sup> and the biotin-alkyne **X** according to Gurcel *et al.*<sup>3</sup>. The propargyl-protected lysine derivative Plk was prepared as described by Nguyen *et al.*<sup>4</sup>.

### Nutrient Media

All expression experiments with Aha were performed in New Minimal Medium (NMM). This was prepared from autoclaved 5x stock solutions of inorganic salts (37.5mM (NH<sub>4</sub>)<sub>2</sub>SO<sub>4</sub>, 42.5mM NaCl, 110mM KH<sub>2</sub>PO<sub>4</sub>, 250mM K<sub>2</sub>HPO<sub>4</sub>, 5mM MgSO<sub>4</sub>, 5mg/l CaCl<sub>2</sub>, 5mg/l FeCl<sub>2</sub>, 5μg/l CuCl<sub>2</sub>, 5μg/l MnCl<sub>2</sub>, 5μg/l ZnCl<sub>2</sub>). Sterile filtered glucose was added to a final concentration of 20mM, thiamine hydrochloride and d-biotin to a final concentration of 10mg/l. Finally, the medium was supplemented with 50mg/l of all natural amino acids excluding methionine. All bacterial growth was under the selective pressure of 100mg/l carbenicillin.

### Expression and Purification of ahaUb

The gene coding for MASUb76M was synthesized by Geneart and cloned into pGDR11 using *EcoRI* and *SacI*. For expression, the plasmid was transformed into met auxotrophic *E. coli* B834 (*DE3*). Cells were cultured in NMM with 0.04mM Met until they reached stationary growth (OD<sub>600</sub> = 0.8). Medium was then changed to fresh NMM supplemented with 0.5mM Aha and induced with 1mM IPTG after 30min. After 4h, cells were harvested by centrifugation and stored at -80°C until further use.

Pellets were resuspended in lysis-buffer (20mM Tris\*HCl, pH8.8) and solubilized by sonication. Heating the suspension to 75°C for 20min led to denaturation of most *E. coli* proteins. After centrifugation at 20000g for 20min the supernatant was further purified by anion exchange chromatography (Q-Sepharose).

### Expression and Purification of plkUb

The gene coding for (63TAG)Ub was synthesized by Geneart and cloned into pET11a using *XbaI* and *HindIII*. All other (TAG)Ub mutants were created by site directed mutagenesis based on 63(TAG)Ub. The gene for the pyrrolysine tRNA synthetase pylS was obtained from genomic DNA from *Methanosarcina barkeri* and cloned into pRSFduet using *BfuAI* and *SacI*. The gene for the pyrrolysine tRNA was synthesized together with the lipoprotein promoter lpp and the terminator RRN b/c and cloned into the backbone of pET11a already containing the gene for (TAG)Ub in its multiple cloning site. Both vectors were co-transformed into *BL21(DE3)* for expression. Cells were cultured at 37°C. At OD<sub>600</sub> = 0.3, Plk was added to a final concentration of 1mM. Protein expression was induced with 1mM IPTG at OD<sub>600</sub> = 0.8. After 12-16h cells were harvested by centrifugation and protein was isolated as described above.

### Click Reaction

Equimolar amounts of AhaUb and PlkUb in 5 to 20mM Tris\*HCl (pH8) were mixed with 1mM TCEP, 10µM TBTA and 1mM CuSO<sub>4</sub>. Reaction vessels were flushed with argon to prevent Cu-induced protein oxidation. After incubation at room temperature for 1h the reaction was stopped by addition of 10mM EDTA. For biotinylation reactions, a 10-fold excess of biotin-alkyne **X** was used and for labelling with fluorophore tags a 10-fold excess of the respective dye **Y**.

### SDS-PAGE

Expressed proteins and click reactions were analyzed by glycine SDS-PAGE according to standard procedures including a stacking- and a resolving-gel (15%). Gels were stained using Roti<sup>®</sup>-Blue Colloidal Coomassie and photographed using ChemiDoc XRS from BioRad.

### Mass analysis

ESI-IT mass spectra were recorded on a Bruker Daltonics esquire 3000<sup>+</sup>. The protein samples were desalted with G25 columns (GE Healthcare) and diluted in 2% acetic acid in water/CH<sub>3</sub>CN (1:1). Samples were directly injected and data was analyzed with DataAnalysis from Bruker. For the analysis of the peptide fragments tryptic in-gel digest was conducted. After resolution of the resulting peptide fragments in 0.2% formic acid in water, we performed HPLC-ESI-MS/MS (Thermo Scientific LTQ Orbitrap Discovery). Data was analyzed using DataAnalysis from Bruker and Mascot Search.

## References

- (1) Link, A. J.; Vink, M. K. S.; Tirrell, D. A.; *Nature Protocols* **2007**, 2, 1879-1883.
- (2) Bolletta, F.; Fabbri, D.; Lombardo, M.; Prodi, L.; Trombini, C.; Zaccheroni, N.; *Organometallics* **1996**, 15, 2415-2417.
- (3) Gurcel, C.; Vercoutter-Edouart, A.-S.; Fonbonne, C.; Mortuaire, M.; Salvador, A.; Michalski, J.-C.; Lemoine, J.; *Anal. Bioanal. Chem.* **2008**, 390, 2089-2097.
- (4) Nguyen, D. P.; Lusic, H.; Neumann, H.; Kapadnis, P. B.; Deiters, A.; Chin, J. W.; *J. Am. Chem. Soc.* **2009**, 131, 8720-8721.

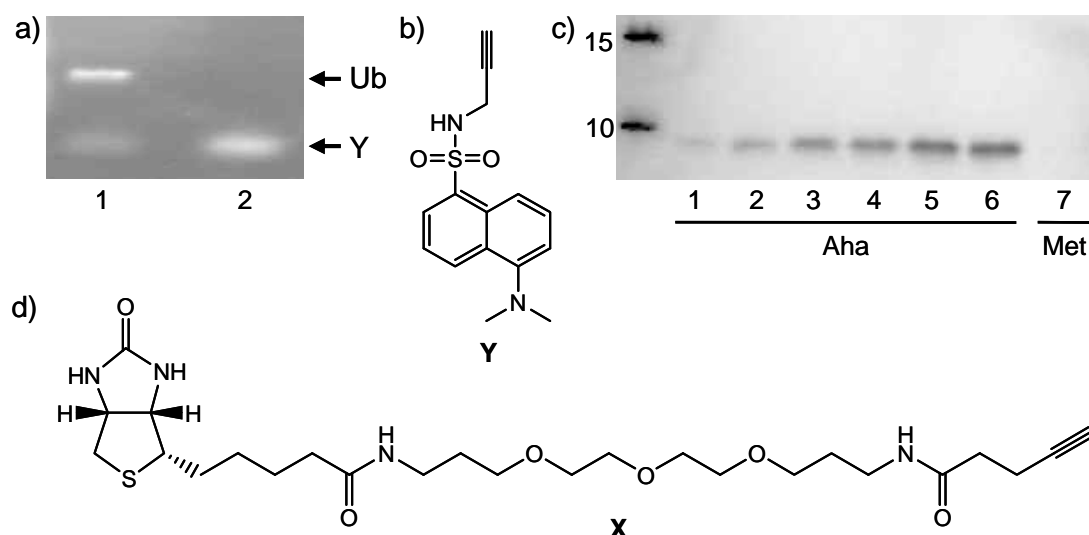

**Figure S1.** Click reactions with 76AhaUb. a) Fluorescence image (SDS-polyacrylamide gel) of click reaction between **Y** and 76AhaUb (lane 1) and 76MetUb (lane 2) as negative control. b) Alkyne functionalized dansyl **Y**. c) Click reaction between 76AhaUb and **X**; western blot with streptavidin-AP conjugates; lane 1 to 6: click reaction at RT with increasing reaction times: 15min (1), 30min (2), 1h (3), 2h (4), 4h (5) and 8h (6); lane 7: click reaction between 76MetUb and **X** at RT for 8h as negative control. d) Alkyne functionalized biotin **X**.

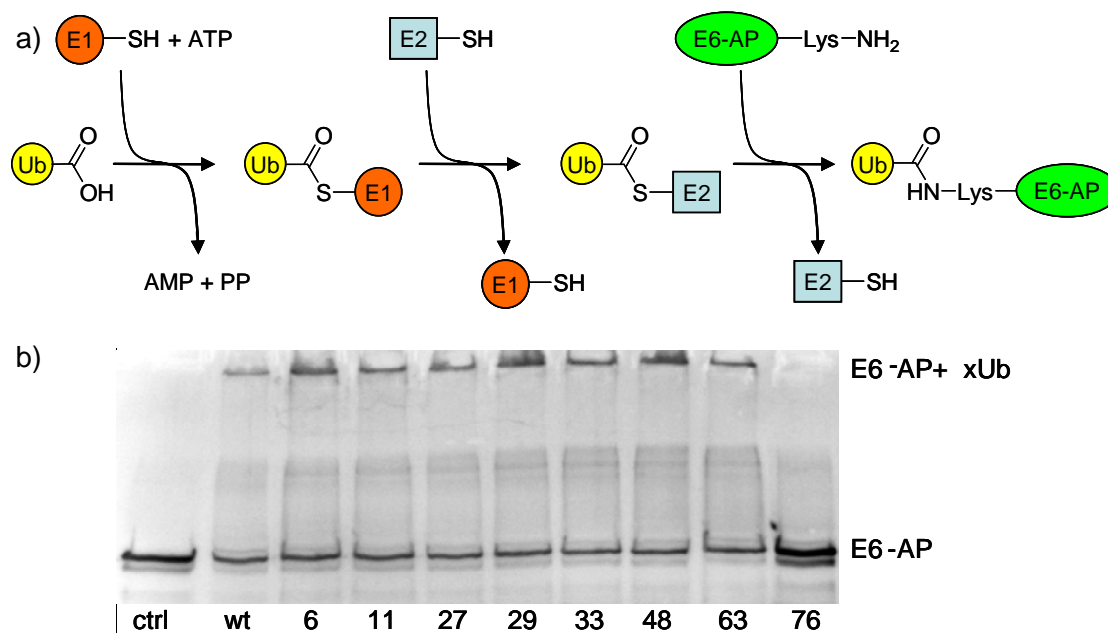

**Figure S2.** E6-AP auto-ubiquitination assay. a) Schematic overview of ubiquitination. Ub is activated by the Ub-activating enzyme E1 at the expense of ATP by forming a thioester complex between the carboxyl group of the C-terminal Gly of Ub and the thiol group of the active site Cys of E1. Activated Ub is then transferred to the active site Cys of an Ub-conjugating enzyme E2 (here UbchH7). Finally, an isopeptide bond between the C-terminal Gly of Ub and a lysine residue of E3-ligase (here E6-AP) or a lysine residue of a second Ub is formed. b) Western blot with anti-Ub antibodies of E6-AP auto-ubiquitination assay with modified Ub monomers. ctrl: reaction without Ub; wt: wtUb; 6: 6PlkUb; 11: 11PlkUb; 27: 27PlkUb; 29: 29PlkUb; 33: 33PlkUb; 48: 48PlkUb; 63: 63PlkUb; 76: 76AhaUb. E6-AP, non-modified E6-AP; E6-AP+xUB, polyubiquitinated E6-AP.



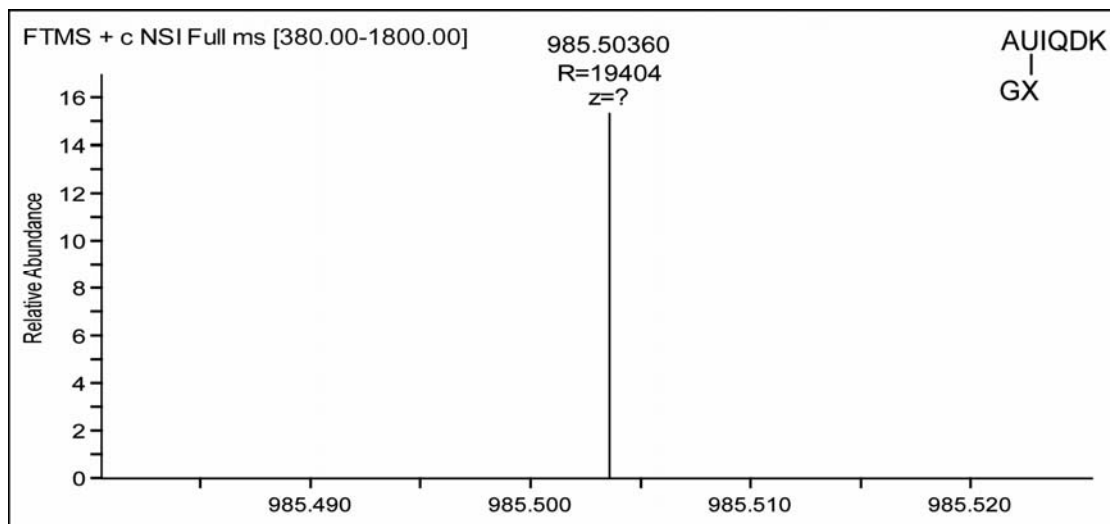

**Figure S5.** MS spectrum of triazole linked fragment of 29PlkUb-76AhaUb after tryptic digest. Due to small fragment size, intensity too low for MS/MS fragmentation.

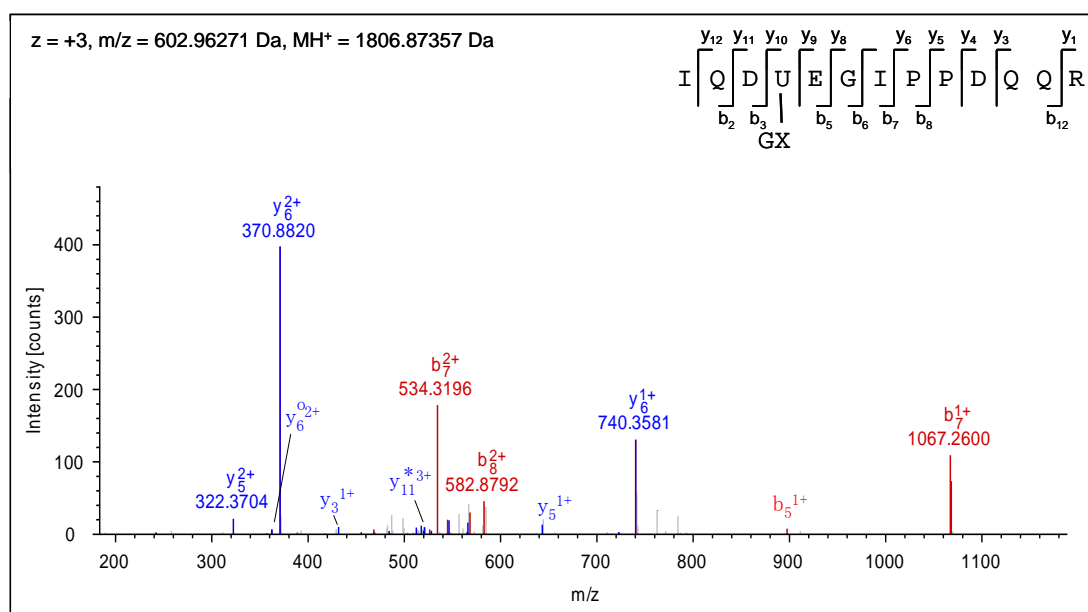

**Figure S6.** MS/MS spectrum of triazole linked fragment of 33PlkUb-76AhaUb after tryptic digest. All b- and y-ions marked in the peptide sequence were found in the corresponding MS/MS spectrum. b/y<sup>o</sup>: b/y minus H<sub>2</sub>O; b/y<sup>\*</sup>: b/y minus NH<sub>3</sub>.

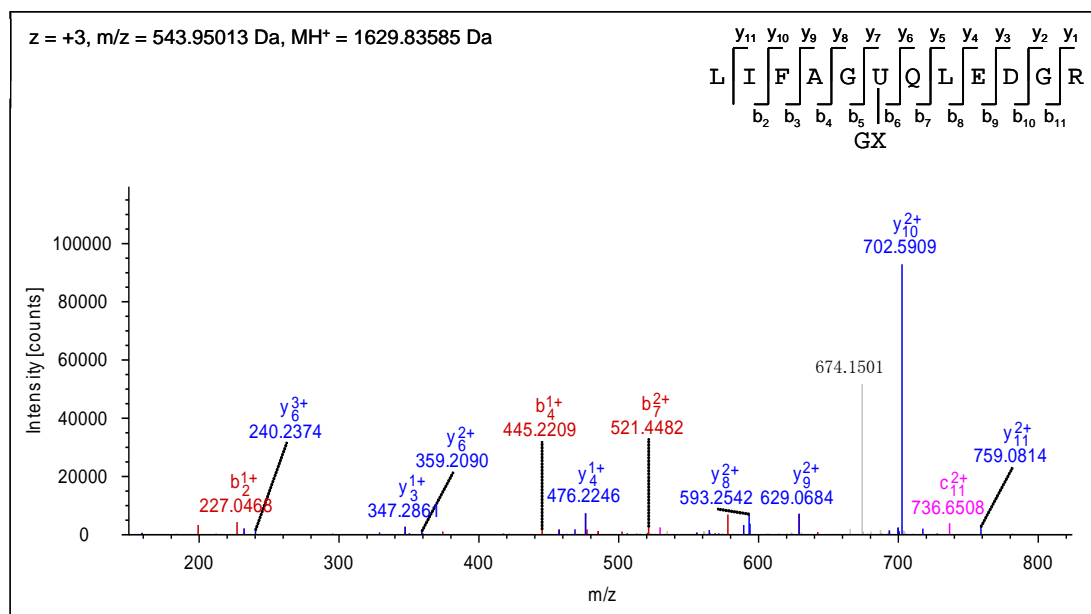

**Figure S7.** MS/MS spectrum of triazole linked fragment of 48PlkUb-76AhaUb after tryptic digest. All b- and y-ions marked in the peptide sequence were found in the corresponding MS/MS spectrum. b/y<sup>°</sup>: b/y minus H<sub>2</sub>O; b/y<sup>\*</sup>: b/y minus NH<sub>3</sub>.

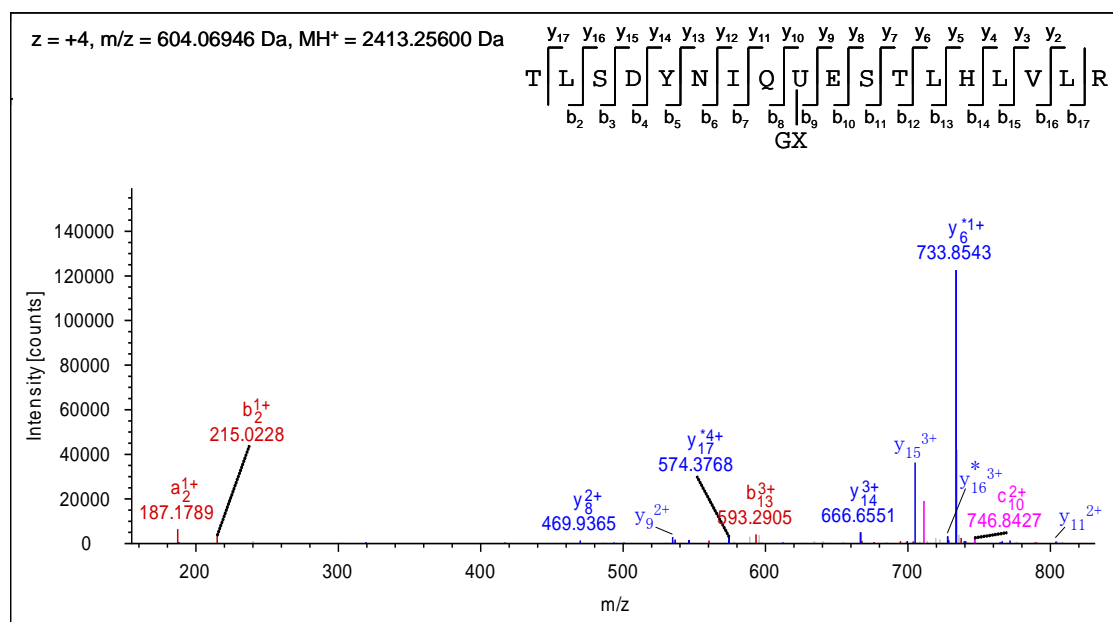

**Figure S8.** MS/MS spectrum of triazole linked fragment of 63PlkUb-76AhaUb after tryptic digest. All b- and y-ions marked in the peptide sequence were found in the corresponding MS/MS spectrum. b/y<sup>°</sup>: b/y minus H<sub>2</sub>O; b/y<sup>\*</sup>: b/y minus NH<sub>3</sub>.
